# Supplementary figures and images for: Hadal water biogeochemistry over the Izu-Ogasawara Trench observed with a full-depth CTD-CMS
Source: Copernicus journal article supplement (doi:10.5194/os-2018-37), 2018-04-03

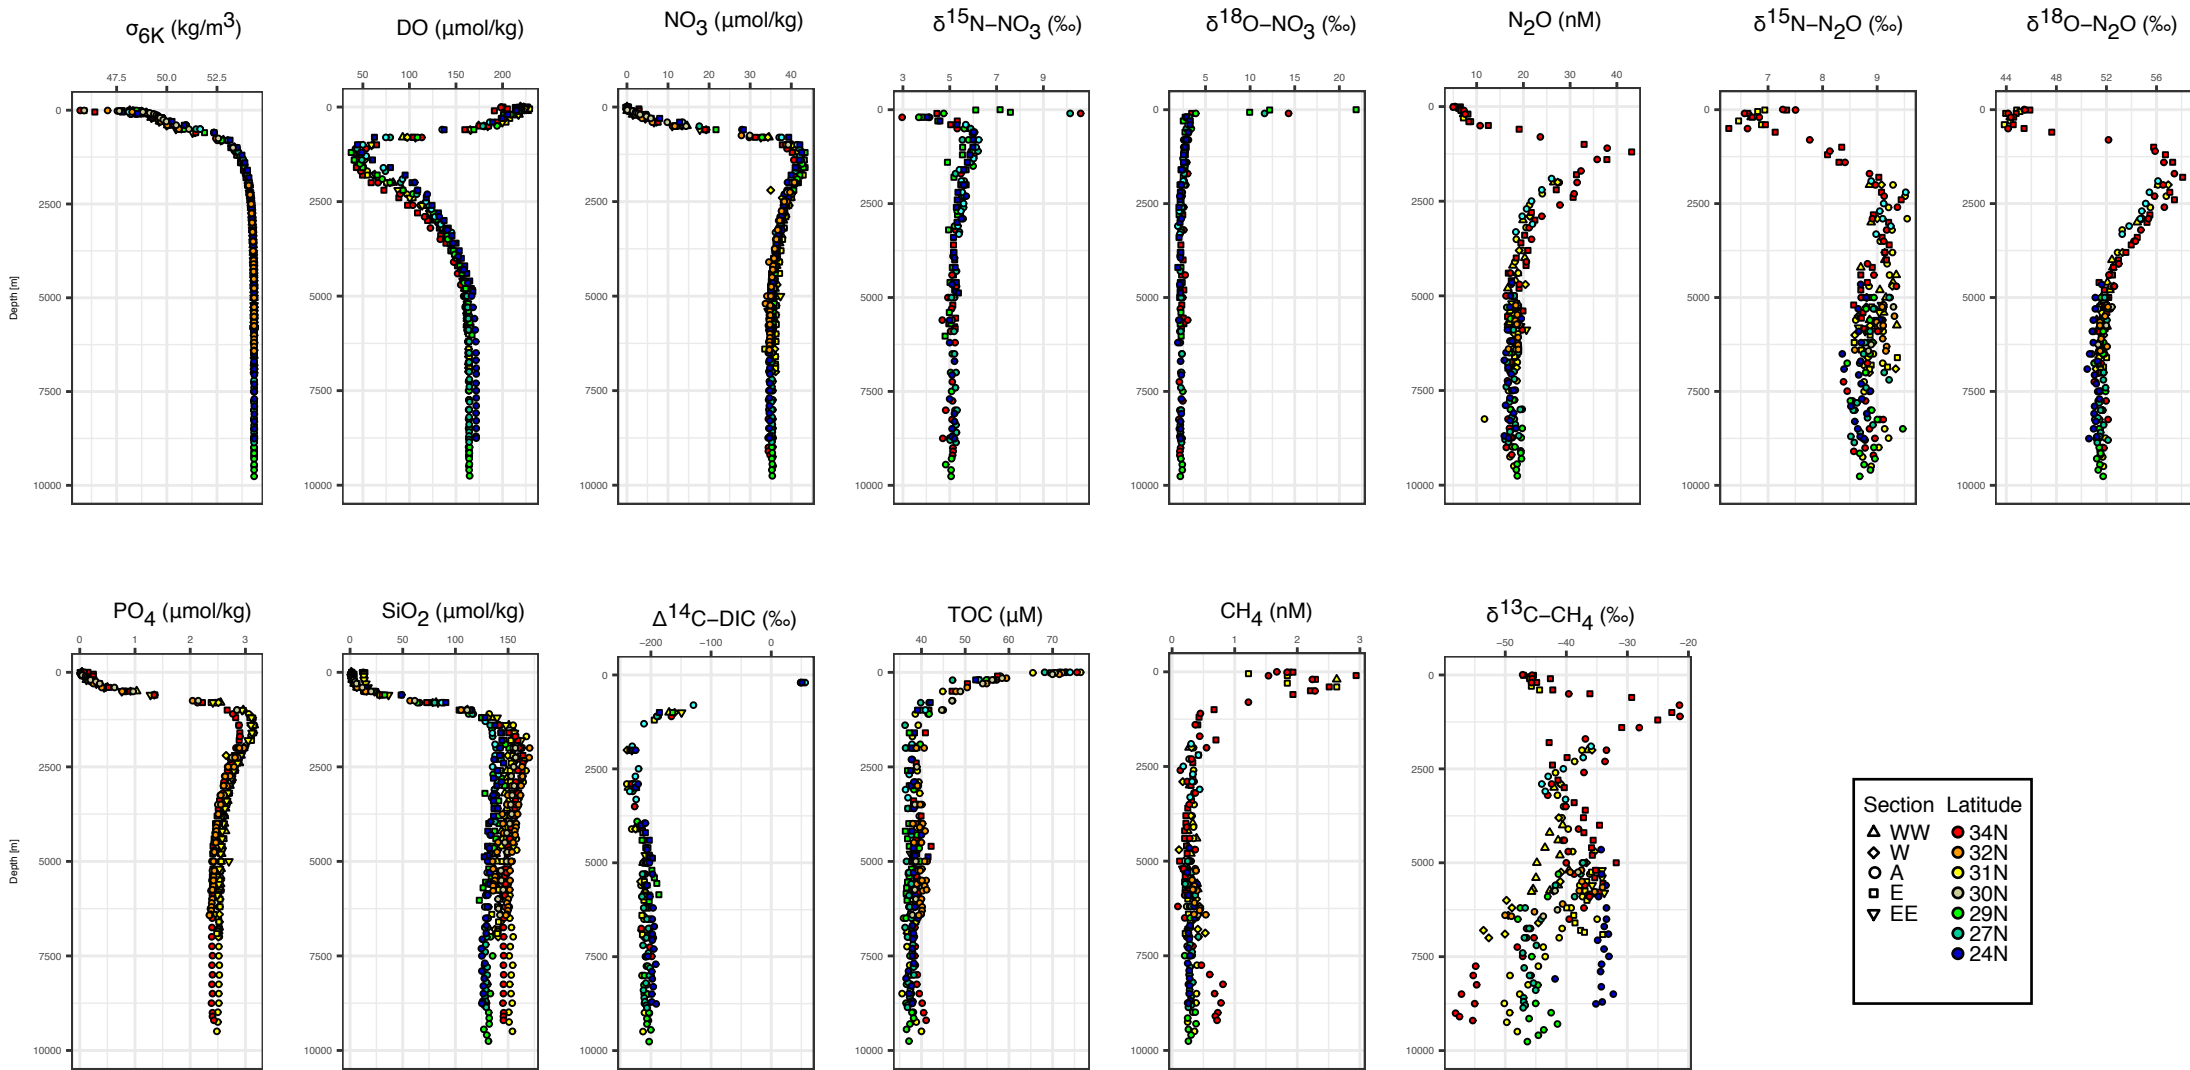

Supplement: Supplementary file 1 [file os-2018-37-supplement.zip]
